# Supplementary material for: COVID-19 Vaccine Booster Hesitancy (VBH) of Healthcare Workers in Czechia: National Cross-Sectional Study
Source: MDPI journal article supplement (doi:10.3390/vaccines9121437), 2021-12-06
Supplement: s1 [file s1]

Supplementary File

# COVID-19 Vaccine Booster Hesitancy (VBH) of Healthcare Workers in Czechia: National Cross-sectional Study

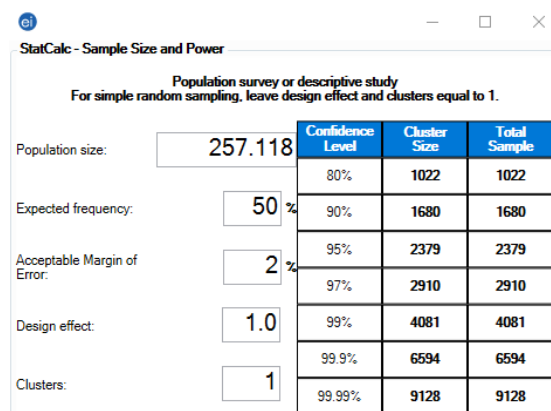

Figure S1. The sample size of healthcare workers in Czech Republic—Epi-Info™ version 7.2.4.

Table S1. The results of test re-test reliability.

| Participant | $\kappa$ coefficient | Participant | $\kappa$ coefficient |
|-------------|----------------------|-------------|----------------------|
| No. 1       | 0.77                 | No. 5       | 1.00                 |
| No. 2       | 0.85                 | No. 6       | 1.00                 |
| No. 3       | 0.69                 | No. 7       | 0.55                 |
| No. 4       | 0.57                 | No. 8       | 1.00                 |

Cohen's Kappa statistic ( $\kappa$ ); 0.01 – 0.20 as none to slight, 0.21 – 0.40 as fair, 0.41 – 0.60 as moderate, 0.61–0.80 as substantial, and 0.81–1.00 as perfect agreement [1].

Table S2. Demographic Characteristics of Czech Healthcare Workers Responding to COVID-19 Vaccine BD Survey, November 2021 ( $n = 3454$ ).

| Variable                   | Outcome                   | Frequency ( $n$ ) | Percentage (%) |
|----------------------------|---------------------------|-------------------|----------------|
| Gender                     | Female †                  | 2796              | 80.9 %         |
|                            | Male                      | 643               | 18.6 %         |
|                            | LGBTQ+                    | 15                | 0.4 %          |
| † Pregnancy                | Yes ‡                     | 25                | 0.9 %          |
|                            | No                        | 2771              | 99.1 %         |
| ‡ Trimester                | 1 <sup>st</sup> Trimester | 9                 | 36 %           |
|                            | 2 <sup>nd</sup> Trimester | 10                | 40 %           |
|                            | 3 <sup>rd</sup> Trimester | 6                 | 24 %           |
| Age                        | ≤ 47 years-old            | 1744              | 50.5 %         |
|                            | > 47 years-old            | 1710              | 49.5 %         |
| Profession (Medical)       | Physician                 | 980               | 28.4 %         |
|                            | Dentist                   | 14                | 0.4 %          |
|                            | Pharmacist                | 53                | 1.5 %          |
| Profession (Allied Health) | General Nurse             | 1452              | 42 %           |
|                            | Paediatric Nurse          | 150               | 4.3 %          |
|                            | Midwife                   | 90                | 2.6 %          |
|                            | Paramedic                 | 28                | 0.8 %          |

|               |                                     |      |        |
|---------------|-------------------------------------|------|--------|
|               | Physiotherapist                     | 85   | 2.5 %  |
|               | Nutrition Therapist                 | 57   | 1.7 %  |
|               | Occupational Therapist              | 10   | 0.3 %  |
|               | Speech Therapist                    | 7    | 0.2 %  |
|               | Psychologist                        | 30   | 0.9 %  |
|               | Addictologist                       | 8    | 0.2 %  |
|               | Pharmaceutical Assistant            | 103  | 3.0 %  |
|               | Medical Laboratory Technician       | 145  | 4.2 %  |
|               | Radiology Assistant                 | 69   | 2.0 %  |
|               | Radiology Physicist                 | 11   | 0.3 %  |
|               | Biomedical Engineer                 | 24   | 0.7 %  |
|               | Biomedical Technician               | 3    | 0.1 %  |
|               | Specialist in Public Health         | 15   | 0.4 %  |
|               | Specialist in Laboratory Methods    | 74   | 2.1 %  |
|               | Specialist in Healthcare Management | 36   | 1.0 %  |
|               | Public Health Assistant             | 6    | 0.2 %  |
|               | Dental Technician                   | 4    | 0.1 %  |
| <b>Region</b> | Central Bohemian                    | 337  | 9.8 %  |
|               | Prague                              | 1010 | 29.2 % |
|               | South Moravian                      | 699  | 20.2 % |
|               | Moravian-Silesian                   | 208  | 6.0 %  |
|               | Usti nad Labem                      | 185  | 5.4 %  |
|               | South Bohemian                      | 74   | 2.1 %  |
|               | Olomouc                             | 124  | 3.6 %  |
|               | Plzen                               | 90   | 2.6 %  |
|               | Zlín                                | 117  | 3.4 %  |
|               | Hradec Kralove                      | 152  | 1.7 %  |
|               | Pardubice                           | 154  | 4.5 %  |
|               | Vysočina                            | 139  | 4.0 %  |
|               | Liberec                             | 107  | 3.1 %  |
|               | Karlovy Vary                        | 58   | 4.4 %  |

No missing data. † Female participants. ‡ Pregnant participants.

## References

1. McHugh, M.L. Interrater reliability: The kappa statistic. *Biochem. Medica* **2012**, *22*, 276–282, doi:10.11613/bm.2012.031.
